# Supplementary material
Source: publisher site journal article supplement (https://static.cambridge.org/content/id/urn:cambridge.org:id:article:S1041610218001436/resource/name/S1041610218001436supp002.docx)
Supplement: Supplementary file 1 [file S1041610218001436supp002.docx]

# Appendix A2.

**Forest Plots for Meta-analyses of Anxiety, Depression, Burden and Distress Outcomes**

*Note*. Favours A = favours control group; Favours B = favours intervention group.


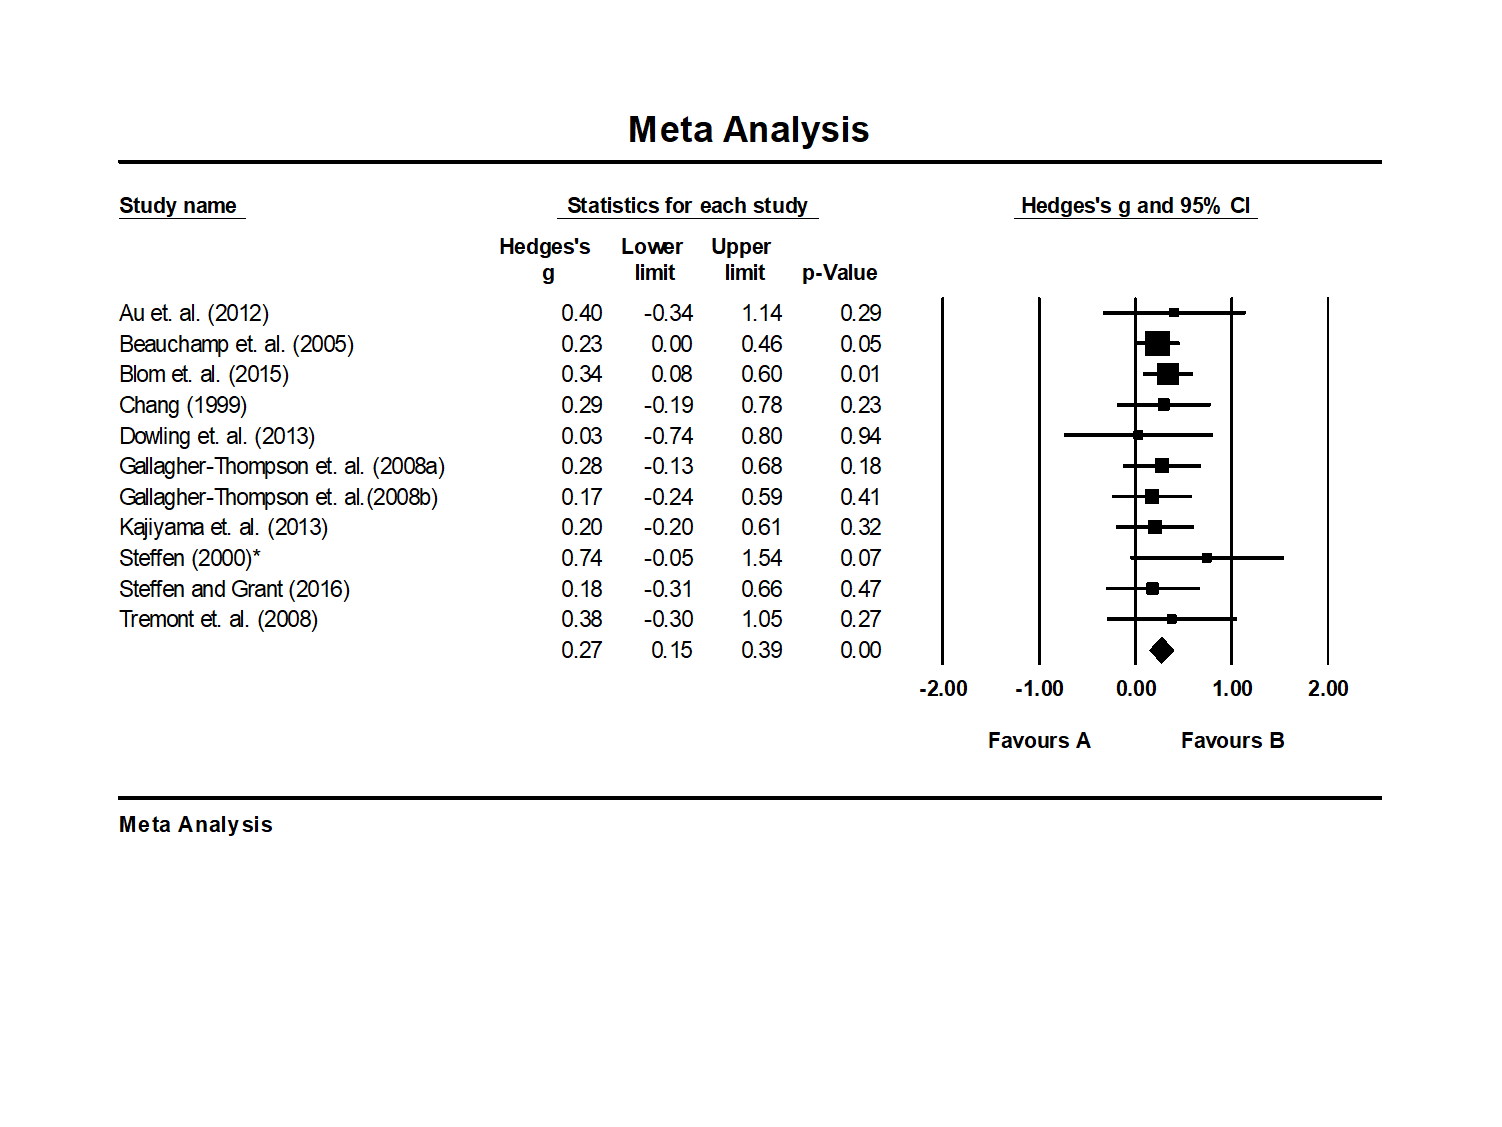


**Depression**


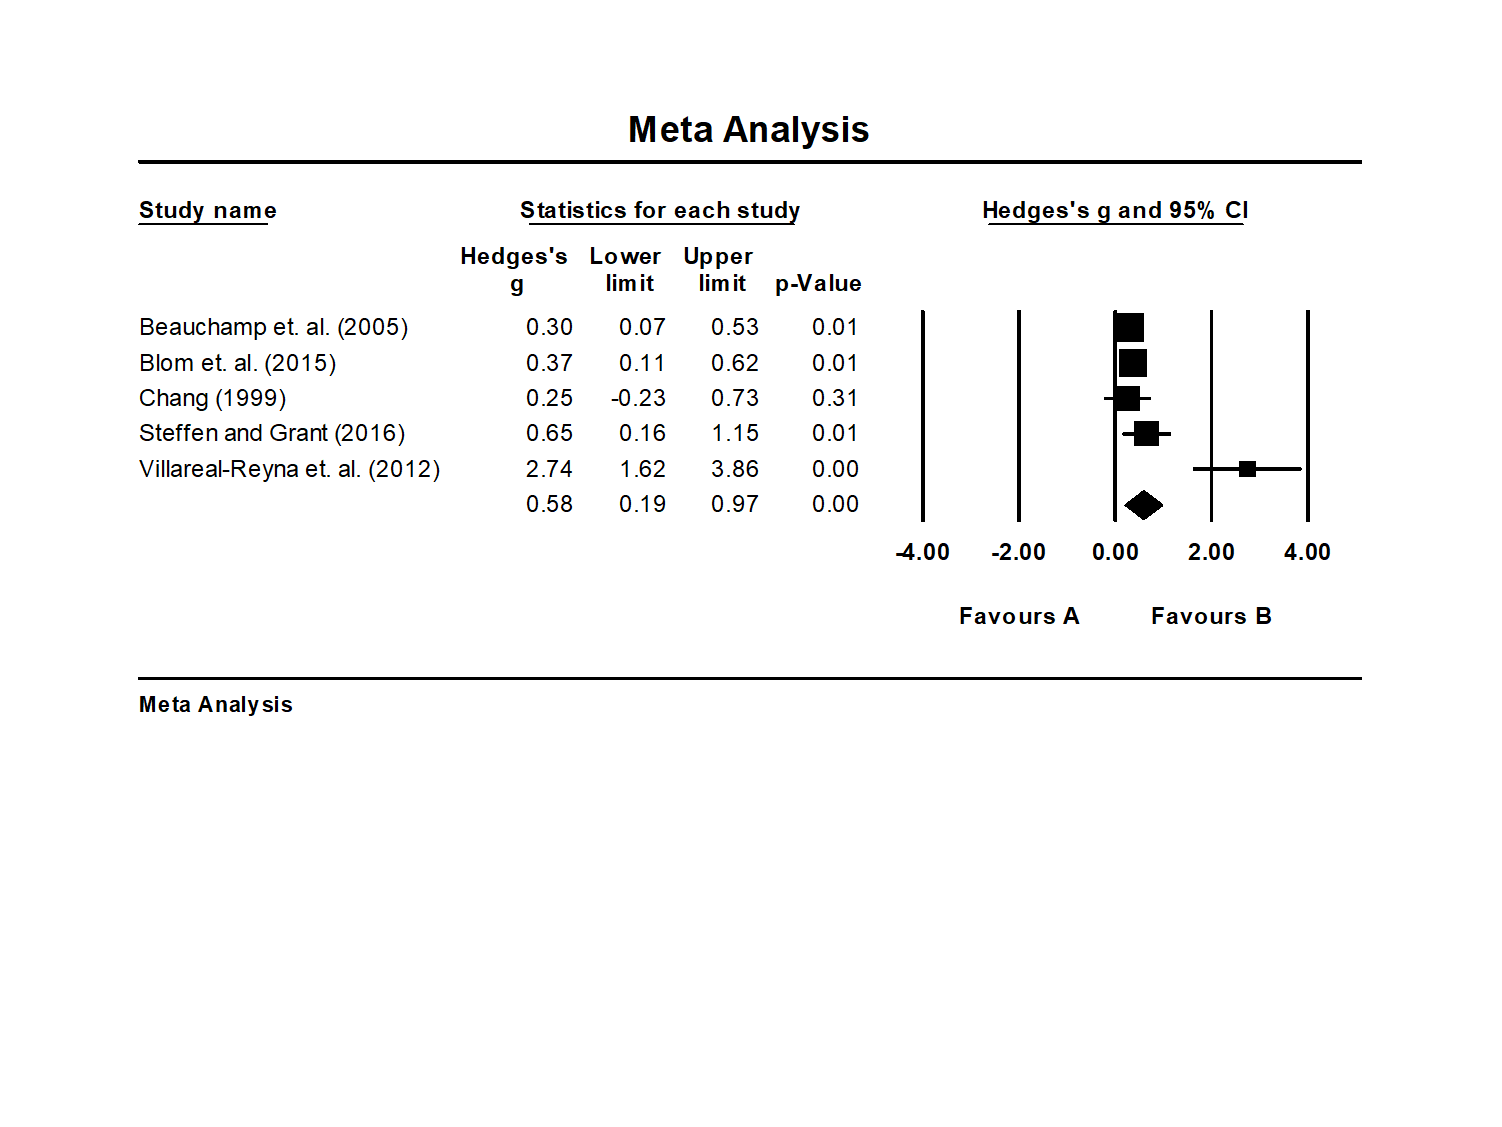


**Anxiety**


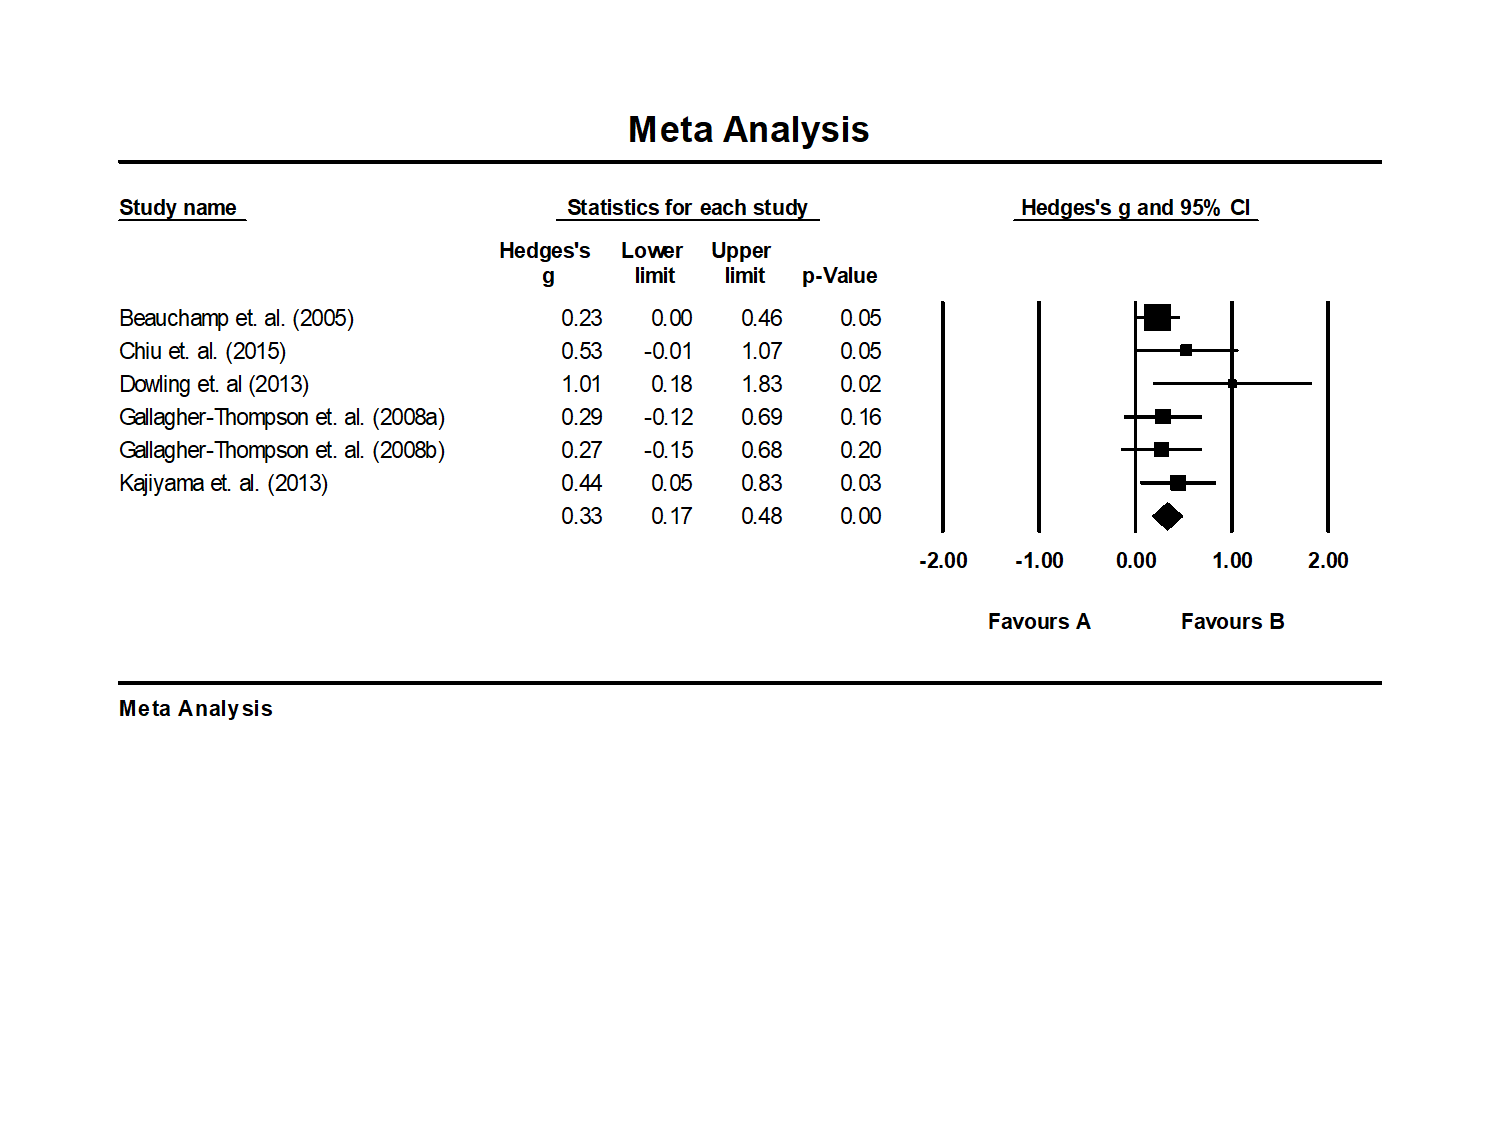


**Distress**


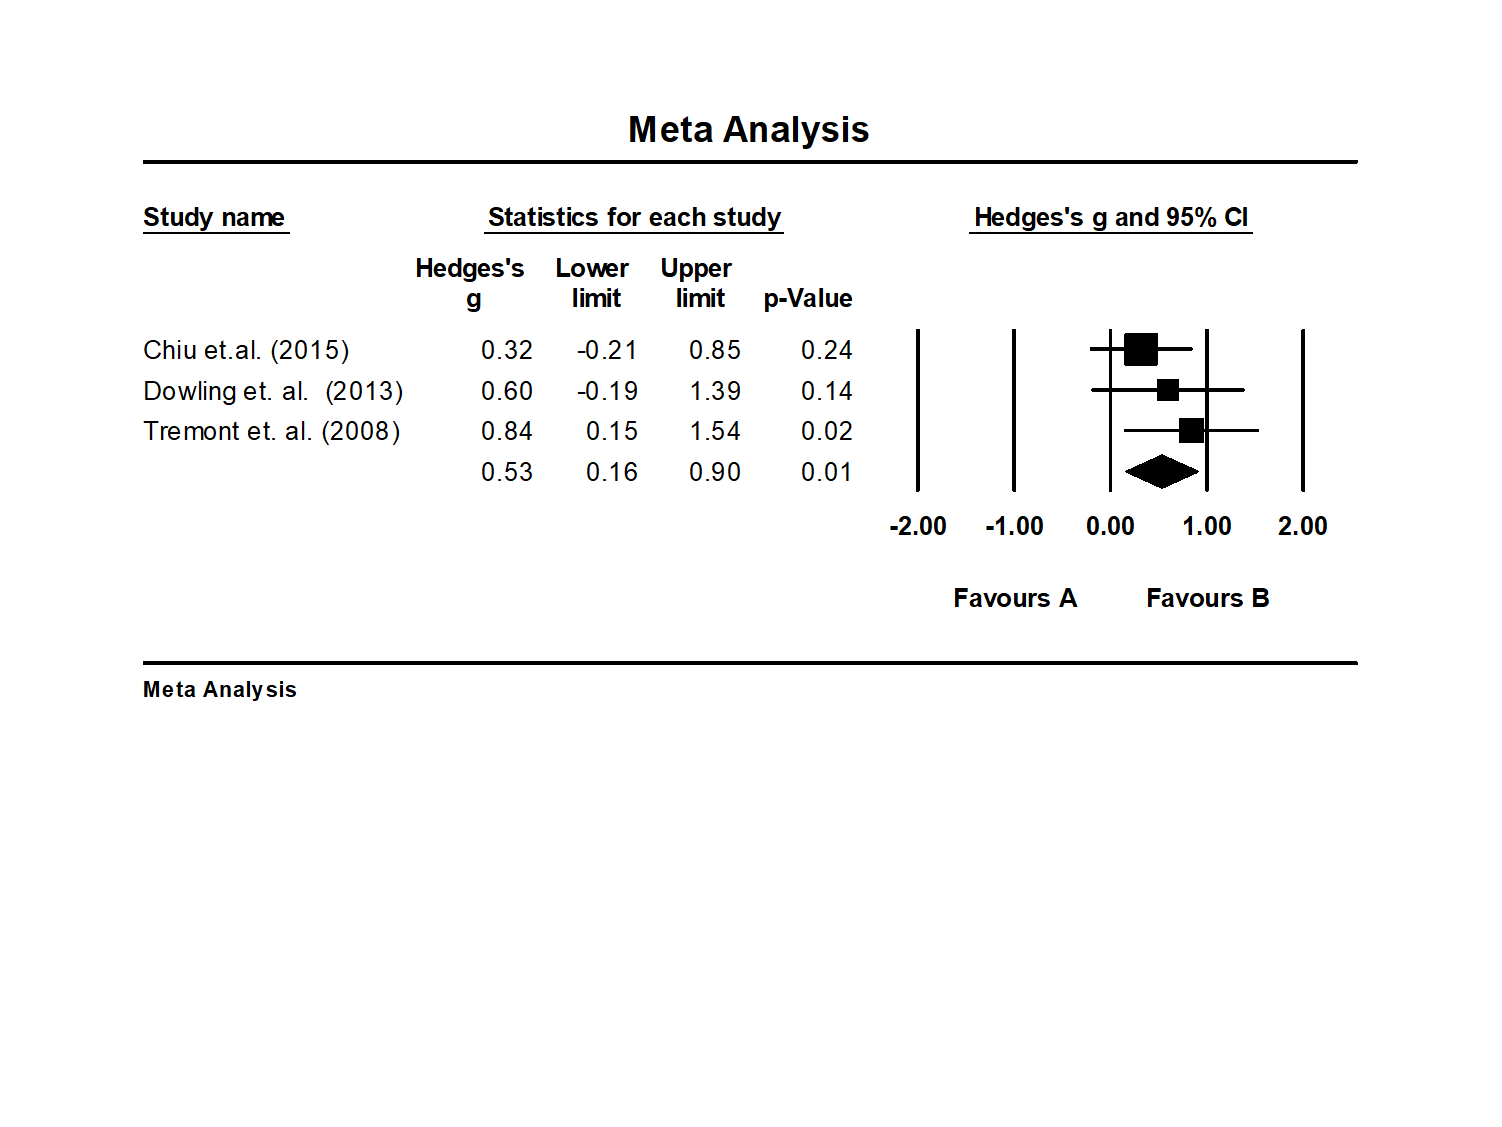


**Burden**
